# Supplementary material for: Food matrix and co-presence of turmeric compounds influence bioavailability of curcumin in healthy humans
Source: Royal Society of Chemistry journal article supplement (doi:10.1039/c9fo01063g), 2019-01-01
Supplement: c9fo01063g1.xlsx [file c9fo01063g1.xlsx]

## Sheet: Sheet1
		Sample 8 from 17/05/2019
	Results are in ng/mL			309.1 > 147.0	339.1>255.1	369.1 > 177.0	373.2 > 137.1
Sample ID	Sample number for worklist		Notes	Bisdemethoxycurcumin 1	Demethoxycurcumin 1	Curcumin 2	Tetrahydrocurcumin 1
20	8	Box 1		1.01758	14.4824	14.2643	0
309.1 > 147.0
Bisdemethoxycurcumin 1
317.4 > 151.0
Bisdemethoxycurcumin d8
339.1>255.1
Demethoxycurcumin 1
Note DMC had no labelled version so this used
317.4 > 151.0
Bisdemethoxycurcumin d8
369.1 > 177.0
Curcumin 2
375.1 > 180.0
Curcumin d6
373.2 > 137.1
Tetrahydrocurcumin 1
Not reported S/N ratio < 10
379.5 > 140.0
Tetrahydrocurcumin d6
