# Supplementary material for: Food matrix and co-presence of turmeric compounds influence bioavailability of curcumin in healthy humans
Source: Royal Society of Chemistry journal article supplement (doi:10.1039/c9fo01063g), 2019-01-01
Supplement: c9fo01063g2.pdf [file c9fo01063g2.pdf]

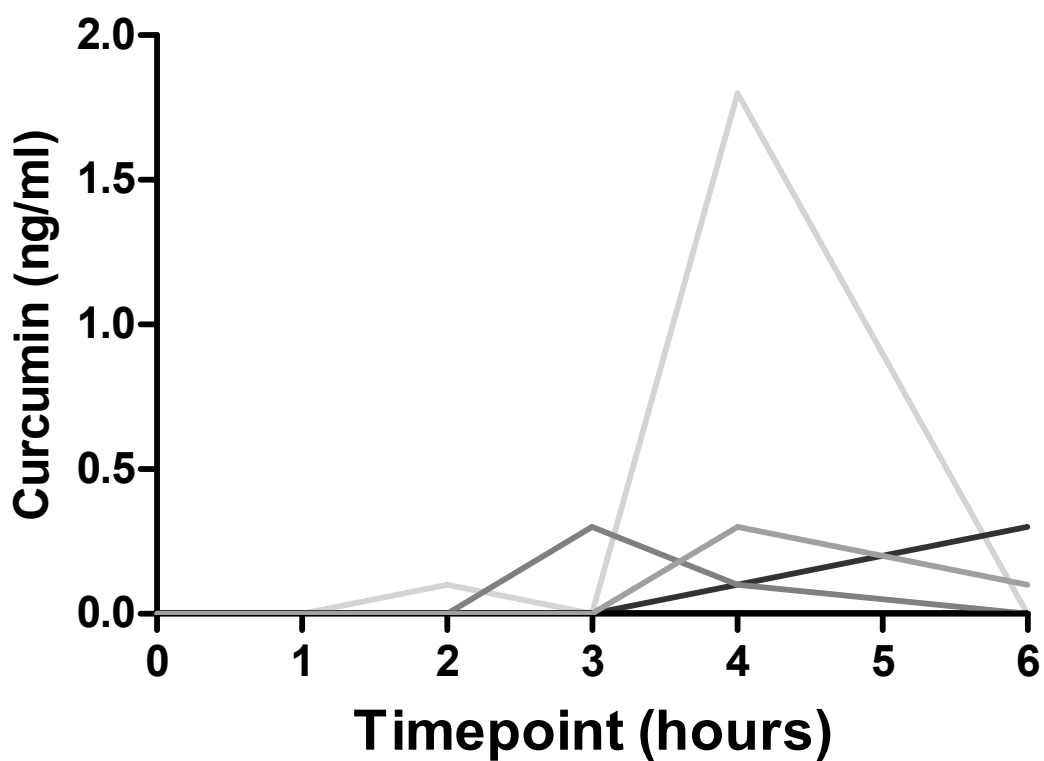

Supplementary figure 1 Plasma curcumin levels for individual participants after consumption of curcumin powder meal for all 14 participants. Only four participants had detectable plasma curcumin.

Supplementary table 1 The limit of detection (LoD) and the limit of quantitation (LoQ) calculated from the Signal to Noise Ratio of the lower standard.

|                                       |          |           |              |
|---------------------------------------|----------|-----------|--------------|
| In turmeric powder and fresh turmeric |          |           |              |
|                                       | Curcumin | Demethoxy | BisDemethoxy |
|                                       | mg/100g  |           |              |
| Theoretical LoQ                       | 10       | 14.3      | 10.6         |
| Theoretical LoD                       | 3        | 4.3       | 3.2          |

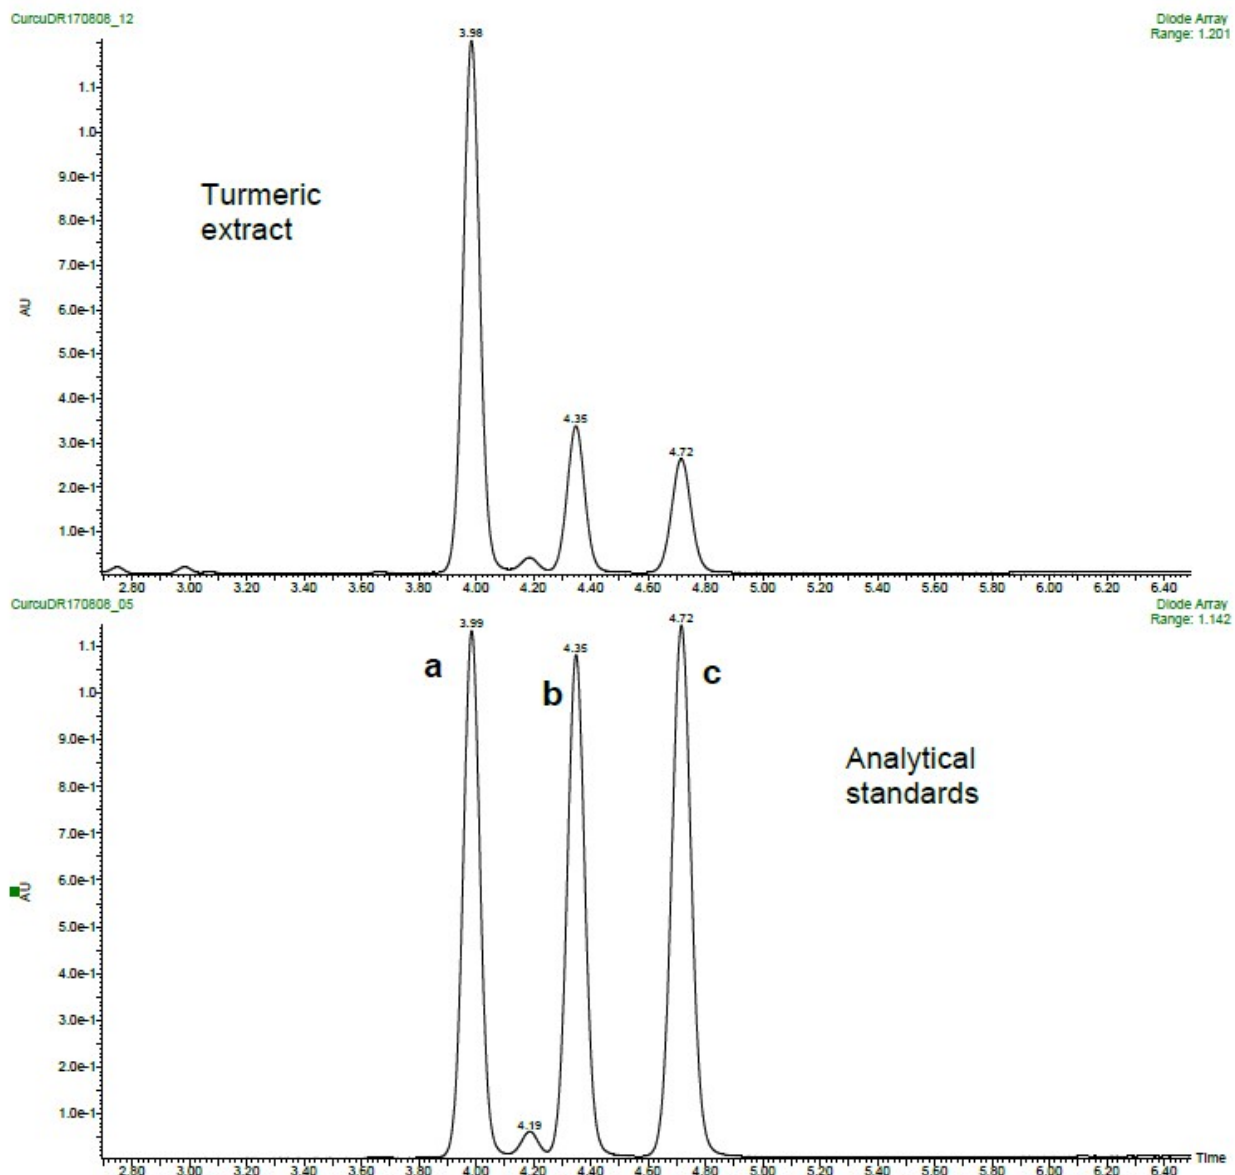

Figure 2 Extracted PDA chromatograms of analytical standards and fresh turmeric extract. Peaks id. a) curcumin, b) desmethoxycurcumin and c) bis-desmethoxycurcumin.

**Supplementary table 2** Number of participants with plasma samples collected per time point

| Time point (hours) | 0  | 1  | 2  | 3  | 4  | 6  |
|--------------------|----|----|----|----|----|----|
| Fresh Turmeric     | 14 | 13 | 14 | 13 | 14 | 14 |
| Turmeric powder    | 13 | 13 | 13 | 12 | 13 | 13 |
| Curcumin powder    | 14 | 14 | 13 | 14 | 14 | 14 |
